# Supplementary material
Source: PubMed Central journal article supplement (PMC4288264)

## **Glycosylation of Skp1 Promotes Formation of Skp1/Cullin-1/F-box Protein Complexes in *Dictyostelium***

M. Osman Sheikh, Yuechi Xu, Hanke van der Wel, Paul Walden, Steven D. Hartson, Christopher M. West

### **SUPPLEMENTAL FIGURES AND TABLE LEGENDS**

Suppl. Fig. 1. **Interaction of Cule-FLAG with subunits of the COP9 signalosome and the 19S regulatory particle of the proteasome.** Strains whose *cule* locus was 3'-FLAG-tagged were immunoprecipitated with anti-FLAG, and the protein composition was analyzed by mass spectrometry. Total spectral counts associated with subunits of the COP9-signalosome (CSN) and the 19S-regulatory particle of the 26S-proteasome (PSM) are shown in panels *A* and *B*, respectively. Base and lid subparticle assignments are inferred from sequence-based annotations in dictyBase.org and ref. 33. Data are from single co-IP experiments, analyzed in triplicate, of growth stage (vegetative) and slug stage (developing) cells. Total spectral counts observed from the 3 analyses are shown here; average spectral counts (total divided by the number of subunits detected) are shown in Fig. 4.

Suppl. Fig. 2. **Sequence similarities between *Dictyostelium* Cule and Cula, and Cullin-1.** Alignments of human cullin protein sequences, that lie at the interface with substrate binding adaptors or subunits and differentiate mammalian cullins 1-5 (7), with corresponding cullins from *D. melanogaster*, *C. elegans*, and *S. cerevisiae*, are shown. Sequences are aligned using the 'framework' amino acids highlighted in yellow. Other conserved amino acid identities or similarities that differentiate cullin types are highlighted in different colors. The 5 predicted *Dictyostelium* cullins are assigned according to their best matches.

Suppl. Fig. 3. **Chaperone proteins interacting with FLAG-FbxD.** Hsp- and Cct/TriC-type chaperone proteins that were not detected in control co-IPs are grouped according to class, and plotted according to their abundance based on total or average spectral counts from Suppl. Table 4. Hsp20-like proteins included HspG-1, -2, -4, -5, -6, -7, -8, -9, and -12, HspL and HspM. Cct proteins included Tcp1 and Cct2-8. Protein genes are listed in Suppl. Table 1, annotations are according to www.dictyBase.org, and data are derived from Suppl. Table 4.

Suppl. Table 1. **Observed and predicted SCF-associated proteins in *D. discoideum*.** Proteins identified in the co-IPs shown in Figs. 4-6, listed by protein target. Gene and protein IDs from www.dictyBase.org and UniProt, predicted polypeptide  $M_r$  values, functional predictions, and expression levels during growth (0 h) and development (4-24 h), as inferred from RNAseq studies (35), are shown.

Suppl. Table 2. **Spectral counts report from Cule-FLAG co-IPs.** Summary of data exported from the Scaffold report of the two independent Cule-FLAG co-IPs. Columns in which the Cule-FLAG bait is targeted are shaded in gray; control co-IPs are unshaded. Technical replicates (3 each) reside within the same shading regime. Proteins and peptides (minimum of 2) were each identified at 1% FDR. Only proteins with  $\geq 2$  spectral counts for each of the 3 triplicate analyses in at least one condition are reported. See Fig. 4 and Suppl. Fig. 1 for summary after exclusions were applied.

Suppl. Table 3. **Spectral counts report from Skp1 co-IPs.** Summary of data exported from the Scaffold report of the four independent Skp1 co-IPs. Columns in which Skp1 is targeted are shaded in gray; control co-IPs are unshaded. Technical replicates (3 each) reside within the same shading regime. Proteins and

peptides (minimum of 2) were each identified at 1% FDR. Only proteins with  $\geq 2$  spectral counts for each of the 3 triplicate analyses for at least one condition are listed. See Fig. 5 for summary after exclusions were applied.

Suppl. Table 4. **Spectral counts report from FLAG-FbxD co-IPs.** Summary of data exported from the Scaffold report of the three independent FLAG-FbxD co-IPs. Columns in which the FLAG-FbxD bait is targeted are shaded in gray; those targeting mutant FLAG-FbxD(LP-AA) are in light green; control co-IPs are unshaded. Technical replicates (3 each) reside within the same shading regime. Proteins and peptides (minimum of 2) were each identified at 1% FDR. Only proteins with  $\geq 2$  spectral counts for each of the 3 triplicate analyses for at least one condition are shown. See Fig. 6 and Suppl. Fig. 3 for summary after exclusions were applied.

Supplemental Figure 1

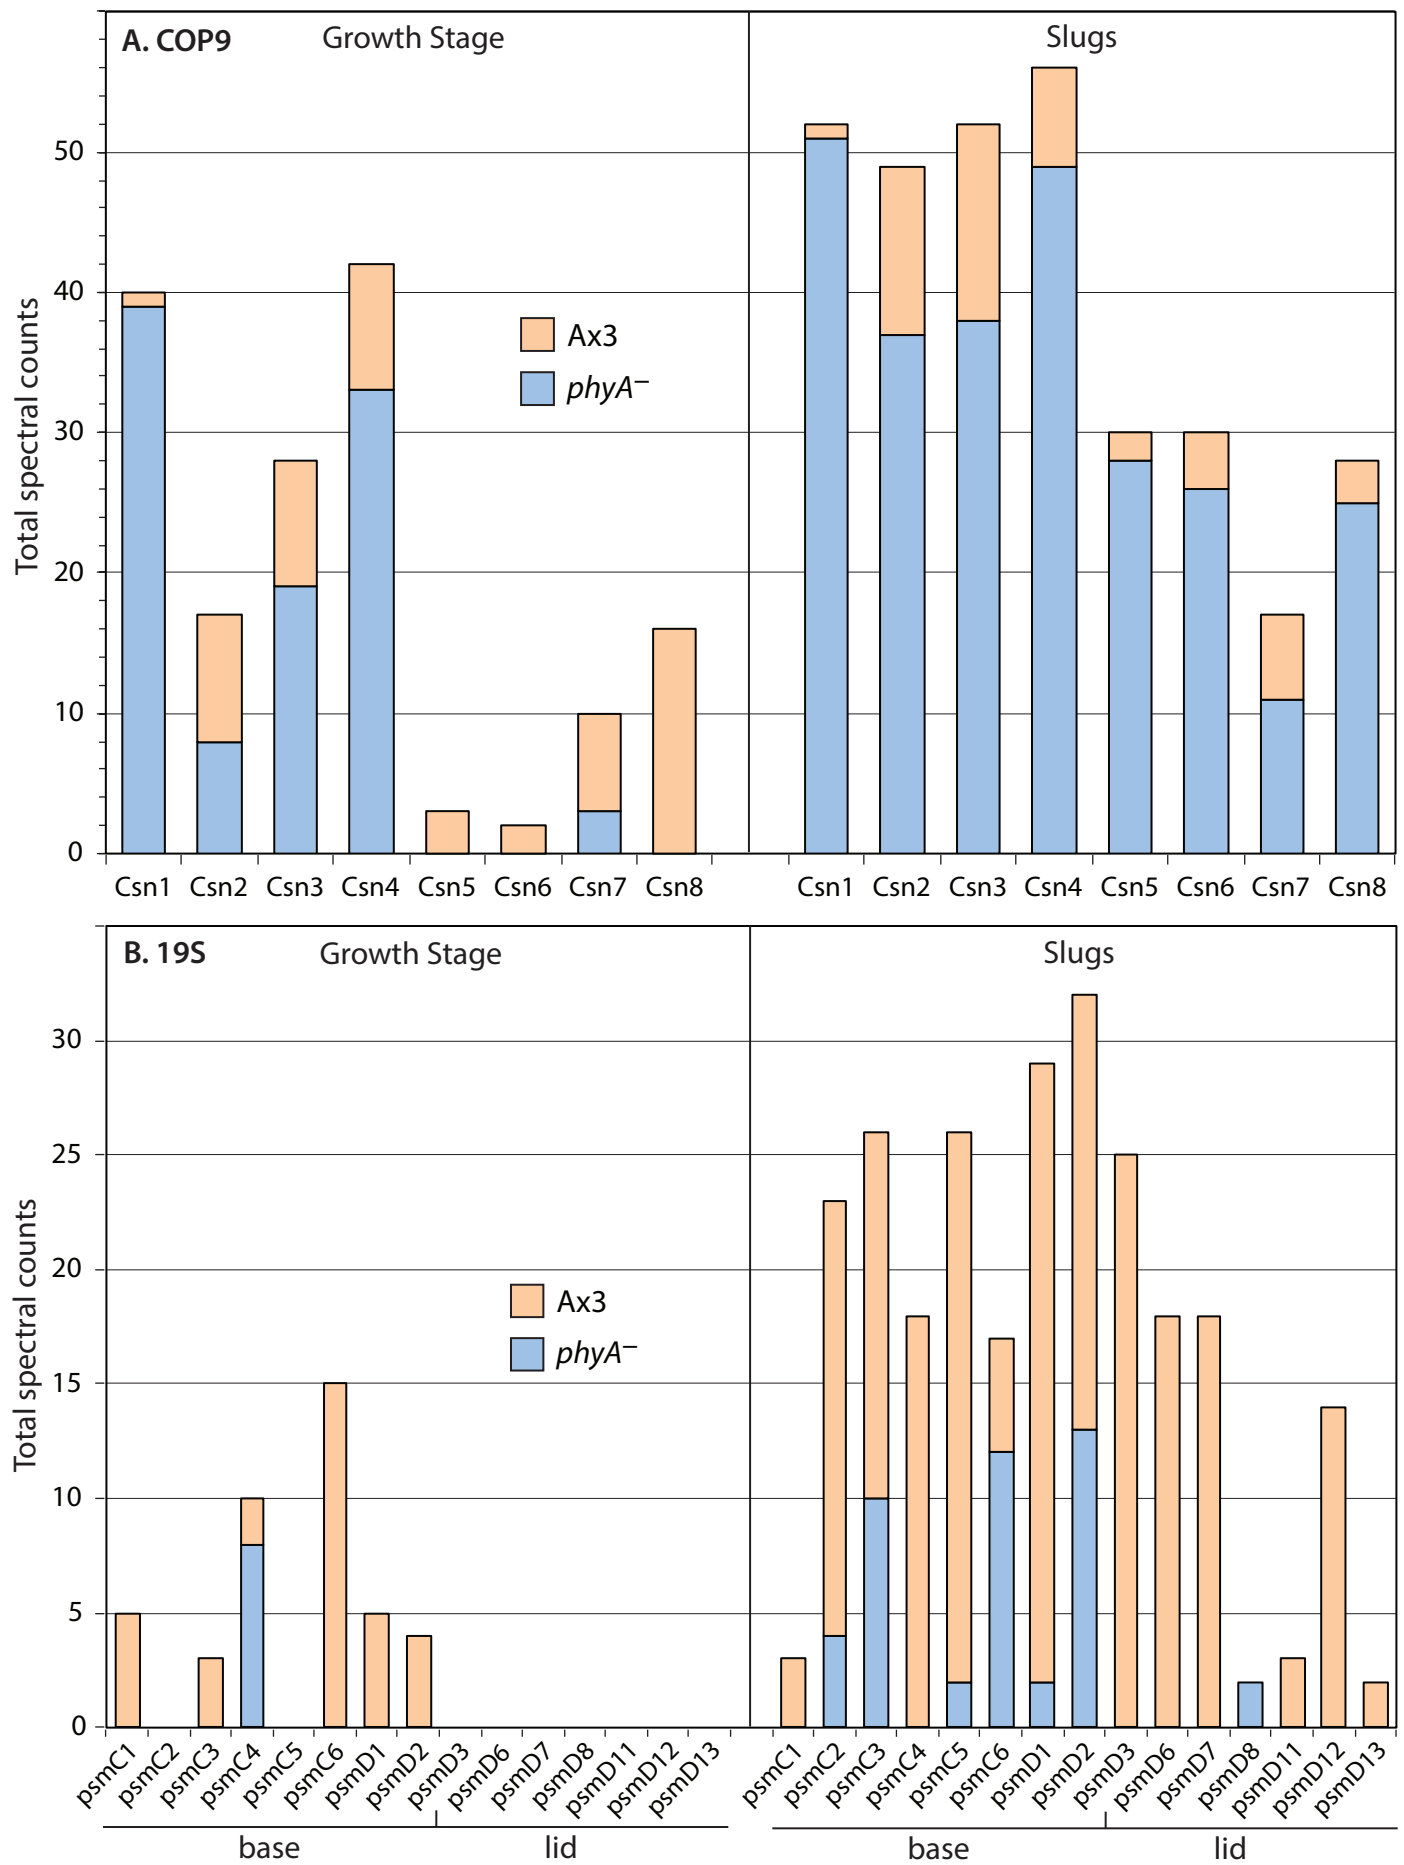

Supplemental Figure 2

|               | Helix 2 Region                                       |               | Helix 5 Region  |
|---------------|------------------------------------------------------|---------------|-----------------|
|               | -----                                                |               | -----           |
| <b>Cul1</b>   |                                                      |               |                 |
| HsCUL-1       | (37)MAKSR <b>Y</b> MEL <b>Y</b> THVYNYCTSVH          | HsCUL-1       | (112)ICAYLNRHWV |
| DmCUL-1       | (37)LTRSQ <b>Y</b> MRFYTHVYDYCTSVS                   | DmCUL-1       | (127)ICNYLNRNWV |
| CeCUL-1       | (33)MAPKD <b>Y</b> MTLYTSVYDYCTSIT                   | CeCUL-1       | (107)IFAYLNRHWI |
| ScCdc53       | (43)LSPTMYMEVYTAIYNYCVN <b>K</b> S                   | ScCdc53       | (130)AFDYMNRYWV |
| <b>DdCulA</b> | (37)FPKQ <b>K</b> WIALYTHVYDYCAASQ                   | <b>DdCulA</b> | (129)IFQYMNRYWI |
| <b>DDCulE</b> | (29)LSRKRYMEIYTKIYNYCSSAN                            | <b>DDCulE</b> | (105)LLSPVNKIHS |
| <b>DdCulB</b> | (30)SQNVSAMFLYEDVYKLCIAQP                            | <b>DdCulB</b> | (105)IFRYLNLNWI |
| <b>Cul2</b>   |                                                      |               |                 |
| HsCUL-2       | (30)VERATW <b>N</b> DRFSDIYALCVAYP                   | HsCUL-2       | (104)LYRYLNTQFI |
| DmCG1512      | (30)VERSVWNTSFS <b>D</b> VYTLCAVQP                   | DmCG1512      | (113)LYIYLNQOHI |
| CeCUL-2       | (30)ITNVQ <b>W</b> HHKFS <b>D</b> VYDICVSIP          | CeCUL-2       | (106)LFGYLNKQFV |
| <b>Cul3</b>   |                                                      |               |                 |
| HsCUL-3       | (49)NSGLSFEELYRNAYTMVLH <b>K</b> H                   | HsCUL-3       | (122)ILMYMDRVYV |
| DmGFT         | (47)NSGLSFEQLYRNAYNMVLH <b>K</b> H                   | DmGFT         | (120)ILMYMDRVYV |
| CeCUL-3       | (46)NSGLSFEELYRNAYTMVLH <b>K</b> H                   | CeCUL-3       | (119)ILMYMDRIYV |
| ScCullinB     | (41)MADLSFEQVYKTIY <b>T</b> IVLN <b>K</b> K          | ScCullinB     | (117)LMMYMDKVYC |
| <b>DdCulC</b> | (45)ASNLSFEELYRNGYNMVLQ <b>K</b> H                   | <b>DdCulC</b> | (117)ILMYMDRNYV |
| <b>Cul4</b>   |                                                      |               |                 |
| HsCUL-4B      | (99)SIKYNLEELYQAVENLCSY <b>K</b> I                   | HsCUL-4B      | (173)IFLFLDRTYV |
| DmCG8711      | (128)PIKYSLEELYQAVVNMCSH <b>K</b> M                  | DmCG8711      | (204)IFLYMDRTYV |
| CeCUL-4       | (100)KTVTTLEGLFSK <b>V</b> RSVCDKNQ                  | CeCUL-4       | (180)IFLHLDRIAL |
| <b>DdCulD</b> | (86)ATTLTQEEELYKMVENL <b>C</b> FDKI                  | <b>DDCulD</b> | (162)IFLYLDRTYV |
| <b>Cul5</b>   |                                                      |               |                 |
| HsCUL-5       | (35)VT <b>K</b> Q <b>Q</b> WFDLFS <b>D</b> VHAVCLWDD | HsCUL-5       | (110)PFCQLEITLM |
| DmCG1401      | (33)VSQRE <b>W</b> QDLFFGVH <b>F</b> VCLWDE          | DmCG1401      | (108)PFRQLEQSPQ |
| CeCUL-5       | (23)VTPAA <b>W</b> QDLFYH <b>V</b> YKITSWVD          | CeCUL-5       | (98)PFKKIDESSR  |

Supplemental Figure 3

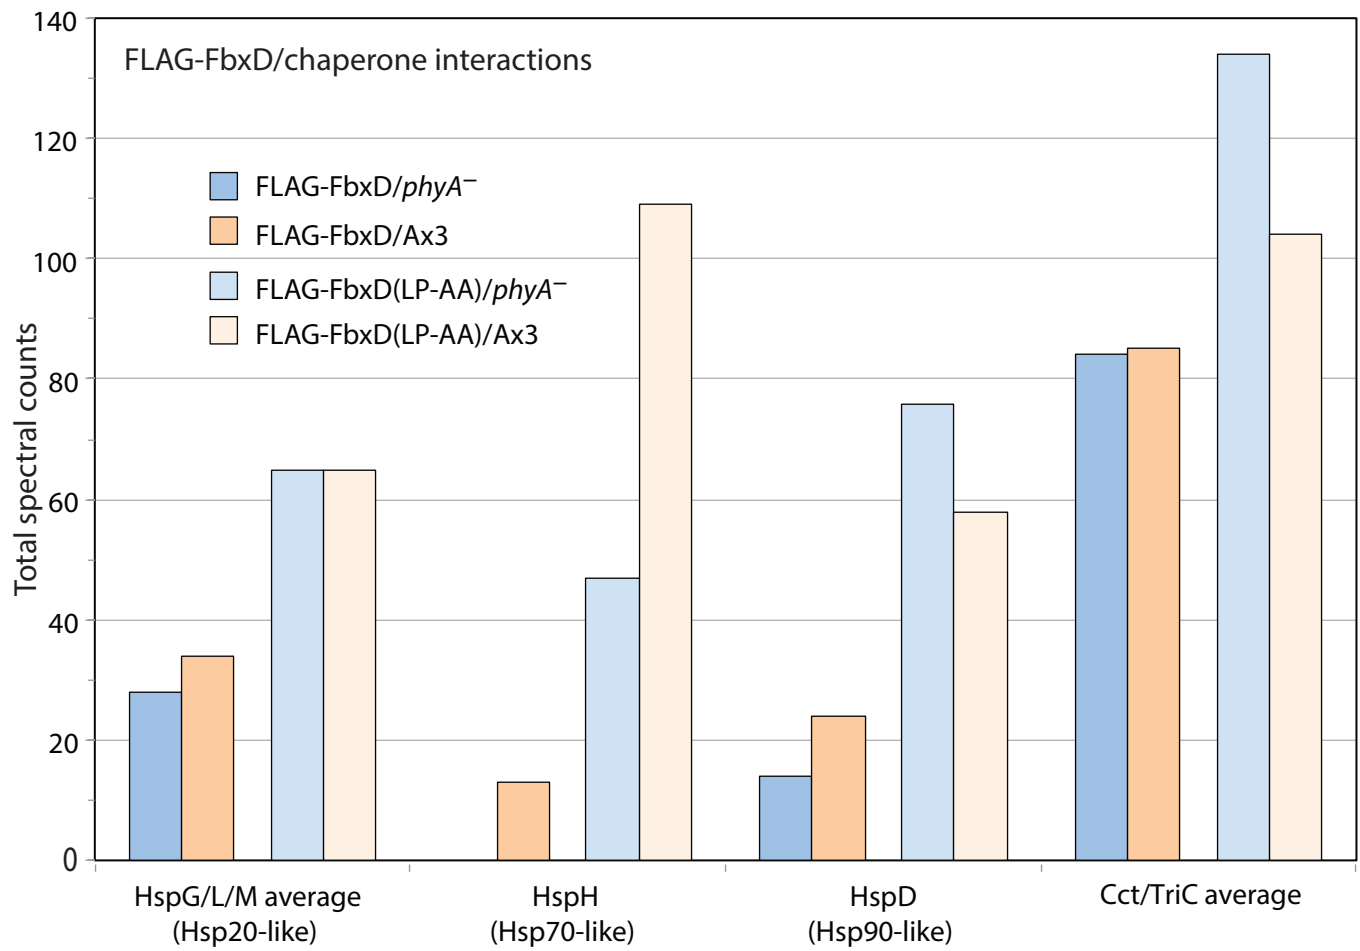

Supplement: supp_M114.044560_mcp.M114.044560-1.pdf [file supp_M114.044560_mcp.M114.044560-1.pdf]
